# Supplementary material
Source: Springer Nature journal article supplement (https://www.springermedizin.de/resource/supplementary/13023_2013_725_MOESM5_ESM.pdf/9642954)

**a** D172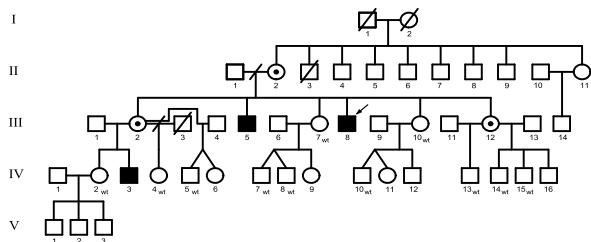**b**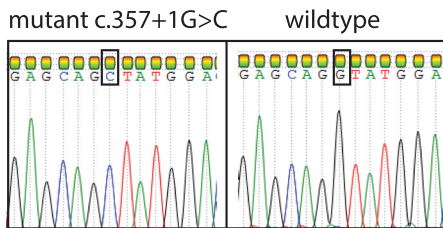**c** D301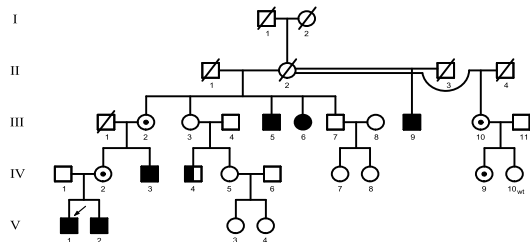**d**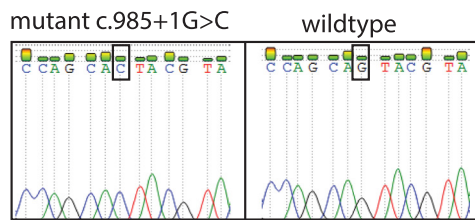**e**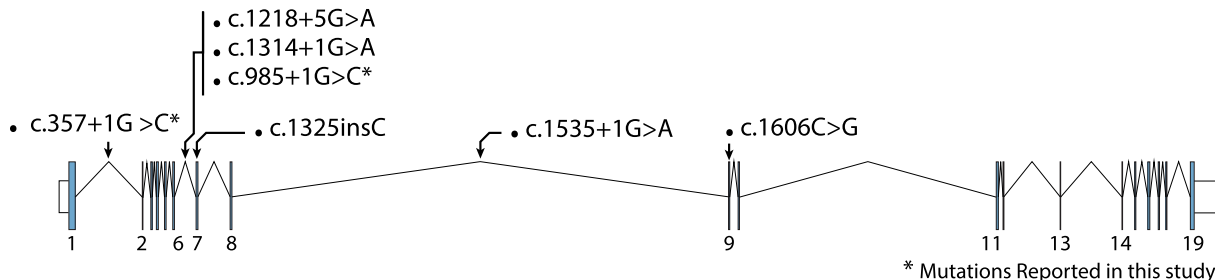

Supplement: MOESM5 [file 9642954]
